# Supplementary material for: Inappropriate usage of selected antimicrobials: Comparative residue proportions in rural and urban beef in Uganda
Source: PubMed Central journal article supplement (PMC6328120; doi:10.1371/journal.pone.0209006), 2019-01-10
Supplement: pone.0209006.s001.pdf [file pone.0209006.s001.pdf]

| #  | Tetracycline                 | Beta-lactam                   | Sex | Age | Breed | Origin |              |
|----|------------------------------|-------------------------------|-----|-----|-------|--------|--------------|
|    | Tet- $\mu\text{g}/\text{kg}$ | Beta- $\mu\text{g}/\text{kg}$ |     |     |       |        |              |
| 1  | 2.7                          | 3.03                          | F   | Y   | L     | R      | Y=young      |
| 2  | 1.9                          | 1.973                         | F   | Y   | X     | R      | A=adult      |
| 3  | 2.3                          | 2.065                         | F   | A   | L     | R      | L=local      |
| 4  | 6.9                          | 2.263                         | M   | Y   | L     | R      | X=crossbreed |
| 5  | 0.9                          | 2.231                         | M   | Y   | X     | R      | R=rural      |
| 6  | 1.2                          | 3.073                         | F   | A   | X     | R      | U=urban      |
| 7  | 12.7                         | 2.785                         | F   | A   | L     | R      |              |
| 8  | 2                            | 3.848                         | M   | A   | X     | R      |              |
| 9  | 6.1                          | 1.527                         | M   | Y   | L     | R      |              |
| 10 | 5.5                          | 2.328                         | F   | A   | L     | R      |              |
| 11 | 2.7                          | 2.037                         | F   | A   | L     | R      |              |
| 12 | 9.8                          | 2.785                         | F   | A   | L     | R      |              |
| 13 | 4                            | 4.352                         | F   | A   | X     | R      |              |
| 14 | 2.6                          | 2.785                         | F   | A   | X     | R      |              |
| 15 | 9.6                          | 1.109                         | F   | A   | X     | R      |              |
| 16 | 8.8                          | 1.966                         | F   | Y   | X     | R      |              |
| 17 | 1                            | 2.785                         | M   | Y   | L     | R      |              |
| 18 | 7.5                          | 4.636                         | M   | A   | L     | R      |              |
| 19 | 5.334                        | 3.426                         | F   | A   | X     | R      |              |
| 20 | 7.642                        | 5.133                         | M   | Y   | X     | R      |              |
| 21 | 25.85                        | 2.48                          | M   | Y   | L     | R      |              |
| 22 | 3.679                        | 14.48                         | M   | Y   | X     | R      |              |
| 23 | 1.85                         | 1.433                         | M   | A   | X     | R      |              |
| 24 | 4.351                        | 2.022                         | F   | A   | L     | R      |              |
| 25 | 19.858                       | 2.124                         | M   | A   | X     | R      |              |
| 26 | 8.179                        | 16.318                        | M   | Y   | X     | R      |              |
| 27 | 3.985                        | 3.105                         | M   | Y   | X     | R      |              |
| 28 | 6.861                        | 2.794                         | M   | Y   | X     | R      |              |
| 29 | 2.333                        | 4.507                         | F   | A   | X     | R      |              |
| 30 | 1.615                        | 3.524                         | M   | Y   | X     | R      |              |
| 31 | 8.967                        | 2.55                          | F   | A   | L     | R      |              |
| 32 | 13.86                        | 2.824                         | F   | Y   | L     | R      |              |
| 33 | 2.527                        | 2.915                         | M   | Y   | L     | R      |              |
| 34 | 4.7                          | 3.539                         | F   | A   | L     | R      |              |
| 35 | 3                            | 2.932                         | M   | Y   | X     | R      |              |
| 36 | 6.1                          | 2.488                         | F   | A   | X     | R      |              |
| 37 | 4.1                          | 2.685                         | M   | Y   | L     | R      |              |
| 38 | 3                            | 3.015                         | M   | Y   | X     | R      |              |
| 39 | 5.1                          | 2.409                         | M   | A   | L     | R      |              |
| 40 | 3.7                          | 2.6                           | F   | A   | L     | R      |              |
| 41 | 6.1                          | 2.128                         | M   | Y   | L     | R      |              |
| 42 | 7.6                          | 2.02                          | M   | A   | X     | R      |              |
| 43 | 2.7                          | 2.278                         | F   | Y   | X     | R      |              |
| 44 | 4                            | 2.508                         | F   | Y   | X     | R      |              |

|    |      |       |   |   |   |   |
|----|------|-------|---|---|---|---|
| 45 | 6.6  | 2.663 | M | Y | L | R |
| 46 | 6.1  | 2.991 | M | A | L | R |
| 47 | 3.2  | 1.857 | M | Y | L | R |
| 48 | 5.1  | 1.949 | M | A | L | R |
| 49 | 2.4  | 2.39  | F | A | L | R |
| 50 | 2.3  | 2.817 | M | A | X | R |
| 51 | 2.4  | 2.75  | M | Y | X | R |
| 52 | 2.5  | 2.548 | M | Y | X | R |
| 53 | 1.8  | 1.77  | F | A | X | R |
| 54 | 4.3  | 1.508 | F | Y | L | R |
| 55 | 2.6  | 2.145 | F | Y | X | R |
| 56 | 2.5  | 1.933 | F | A | L | R |
| 57 | 3.4  | 2.333 | M | Y | X | R |
| 58 | 4.7  | 2.069 | M | Y | X | R |
| 59 | 3    | 4.072 | M | Y | X | R |
| 60 | 2.4  | 3.346 | F | A | L | R |
| 61 | 6.2  | 2.75  | M | Y | L | R |
| 62 | 5.1  | 1.784 | M | A | X | R |
| 63 | 2.7  | 1.865 | M | A | L | R |
| 64 | 1.6  | 1.66  | M | Y | X | R |
| 65 | 9.4  | 0.827 | F | Y | L | R |
| 66 | 1.4  | 2.171 | F | A | L | R |
| 67 | 6.1  | 2.488 | M | A | X | R |
| 68 | 9.1  | 2.197 | F | A | L | R |
| 69 | 5.9  | 2.028 | F | Y | L | R |
| 70 | 8.1  | 2.012 | F | A | L | R |
| 71 | 4    | 2.004 | F | A | L | R |
| 72 | 5.8  | 2.094 | F | A | L | R |
| 73 | 5.3  | 3.254 | M | Y | L | R |
| 74 | 1.6  | 4.239 | F | Y | L | R |
| 75 | 6    | 2.874 | F | A | L | R |
| 76 | 1.6  | 2.794 | F | Y | L | R |
| 77 | 4    | 3.126 | F | Y | L | R |
| 78 | 3    | 4.519 | F | A | L | R |
| 79 | 2.3  | 2.39  | F | A | L | R |
| 80 | 2.4  | 2.206 | F | A | L | R |
| 81 | 5.2  | 3.28  | F | A | L | R |
| 82 | 0.3  | 8.3   | F | Y | L | U |
| 83 | 0.2  | 18    | M | A | L | U |
| 84 | 43.8 | 37.5  | M | A | L | U |
| 85 | 4.7  | 12.7  | F | A | L | U |
| 86 | 2.4  | 26    | F | A | L | U |
| 87 | 0.7  | 24.8  | F | A | L | U |
| 88 | 0.8  | 23.7  | F | A | L | U |
| 89 | 0.7  | 13.6  | F | Y | X | U |
| 90 | 0.4  | 11.1  | F | A | X | U |
| 91 | 0.5  | 9.2   | F | Y | X | U |

|     |      |      |   |   |   |   |
|-----|------|------|---|---|---|---|
| 92  | 65   | 34.3 | F | Y | L | U |
| 93  | 1.8  | 19.3 | F | Y | L | U |
| 94  | 2.1  | 17.8 | F | Y | X | U |
| 95  | 0.7  | 27.8 | M | A | L | U |
| 96  | 5.2  | 11.9 | F | A | X | U |
| 97  | 4.7  | 24.3 | M | A | X | U |
| 98  | 3.1  | 7.6  | F | Y | L | U |
| 99  | 3.9  | 16.8 | F | Y | L | U |
| 100 | 25.9 | 31.4 | M | Y | L | U |
| 101 | 44.1 | 39.9 | F | A | L | U |
| 102 | 1.2  | 10.6 | F | A | L | U |
| 103 | 1.1  | 29.9 | M | A | L | U |
| 104 | 2.4  | 7.7  | F | Y | L | U |
| 105 | 3.9  | 33.3 | F | Y | L | U |
| 106 | 63.5 | 39.8 | M | A | L | U |
| 107 | 37.4 | 62.1 | M | A | L | U |
| 108 | 1.3  | 36.2 | M | A | L | U |
| 109 | 12.8 | 54.7 | F | A | L | U |
| 110 | 1.2  | 39.1 | M | A | L | U |
| 111 | 61.4 | 60.9 | M | A | L | U |
| 112 | 72.8 | 57.1 | F | A | X | U |
| 113 | 3.9  | 41.2 | F | A | L | U |
| 114 | 9.2  | 35.3 | F | A | X | U |
| 115 | 0.9  | 38.5 | M | A | X | U |
| 116 | 70.3 | 77   | M | A | X | U |
| 117 | 14   | 48   | M | A | X | U |
| 118 | 2.9  | 17.3 | M | A | L | U |
| 119 | 76.2 | 76.3 | F | A | L | U |
| 120 | 0.3  | 21.9 | M | A | L | U |
| 121 | 0.2  | 48.8 | F | A | L | U |
| 122 | 0.4  | 23.6 | F | A | L | U |
| 123 | 0.4  | 28.1 | F | A | L | U |
| 124 | 4.7  | 33.4 | M | A | L | U |
| 125 | 4.4  | 24.3 | F | A | L | U |
| 126 | 0.8  | 19.1 | M | A | L | U |
| 127 | 2.5  | 11.6 | F | A | L | U |
| 128 | 2.4  | 16.1 | M | A | L | U |
| 129 | 2.4  | 24.4 | F | A | L | U |
| 130 | 3    | 26.4 | M | A | L | U |
| 131 | 4.3  | 14.8 | F | A | L | U |
| 132 | 3.9  | 10.9 | F | A | L | U |
| 133 | 1.6  | 36.4 | M | A | L | U |
| 134 | 1.3  | 28.5 | F | A | L | U |
