# Supplementary material for: Inappropriate usage of selected antimicrobials: Comparative residue proportions in rural and urban beef in Uganda
Source: PubMed Central journal article supplement (PMC6328120; doi:10.1371/journal.pone.0209006), 2019-01-10
Supplement: pone.0209006.s002.pdf [file pone.0209006.s002.pdf]

The Mixed Procedure

---

|                           |                 |
|---------------------------|-----------------|
| <b>Model Information</b>  |                 |
| Data Set                  | LIB.ANTIBIOTICS |
| Dependent Variable        | Tetracycline    |
| Covariance Structure      | Unstructured    |
| Subject Effect            | place           |
| Estimation Method         | REML            |
| Residual Variance Method  | Profile         |
| Fixed Effects SE Method   | Model-Based     |
| Degrees of Freedom Method | Containment     |

---

|                                |               |               |
|--------------------------------|---------------|---------------|
| <b>Class Level Information</b> |               |               |
| Class                          | <b>Levels</b> | <b>Values</b> |
| place                          | 2             | Rural Urban   |
| Sex                            | 2             | F M           |
| Age                            | 2             | A Y           |
| Breed                          | 2             | L X           |

---

|                          |    |
|--------------------------|----|
| <b>Dimensions</b>        |    |
| Covariance Parameters    | 7  |
| Columns in X             | 7  |
| Columns in Z per Subject | 3  |
| Subjects                 | 2  |
| Max Obs per Subject      | 81 |

---

|                                 |     |
|---------------------------------|-----|
| <b>Number of Observations</b>   |     |
| Number of Observations Read     | 134 |
| Number of Observations Used     | 134 |
| Number of Observations Not Used | 0   |

---

|                          |                    |                        |                  |   |
|--------------------------|--------------------|------------------------|------------------|---|
| <b>Iteration History</b> |                    |                        |                  |   |
| Iteration                | <b>Evaluations</b> | <b>-2 Res Log Like</b> | <b>Criterion</b> |   |
| 0                        | 1                  | 1085.362197            |                  |   |
| 1                        | 1                  | 1080.665136            |                  | 0 |

---

Convergence criteria met but final Hessian is not positive definite.

---

|                                       |                |                 |
|---------------------------------------|----------------|-----------------|
| <b>Covariance Parameter Estimates</b> |                |                 |
| Cov Parm                              | <b>Subject</b> | <b>Estimate</b> |
| UN(1,1)                               | place          | 25.4657         |
| UN(2,1)                               | place          | 0               |
| UN(2,2)                               | place          | 0.000011        |
| UN(3,1)                               | place          | 0               |
| UN(3,2)                               | place          | 0               |
| UN(3,3)                               | place          | 0.000011        |
| Residual                              |                | 209             |

---

|                          |        |
|--------------------------|--------|
| <b>Fit Statistics</b>    |        |
| -2 Res Log Likelihood    | 1080.7 |
| AIC (Smaller is Better)  | 1094.7 |
| AICC (Smaller is Better) | 1095.6 |
| BIC (Smaller is Better)  | 1085.5 |

---

|                                         |                   |                      |
|-----------------------------------------|-------------------|----------------------|
| <b>Null Model Likelihood Ratio Test</b> |                   |                      |
| DF                                      | <b>Chi-Square</b> | <b>Pr &gt; ChiSq</b> |
| 6                                       | 4.7               | 0.5832               |

---

Solution for Fixed Effects

| Effect    | Sex | Age | Breed | Estimate | Standard Error | DF  | t Value | Pr >  t |
|-----------|-----|-----|-------|----------|----------------|-----|---------|---------|
| Intercept |     |     |       | 9.2649   | 4.5673         | 0   | 2.03    | .       |
| Sex       | F   |     |       | -2.6916  | 2.5786         | 129 | -1.04   | 0.2985  |
| Sex       | M   |     |       | 0        | .              | .   | .       | .       |
| Age       |     | A   |       | 1.8589   | 2.7219         | 129 | 0.68    | 0.4959  |
| Age       |     | Y   |       | 0        | .              | .   | .       | .       |
| Breed     |     |     | L     | -0.1712  | 2.7554         | 129 | -0.06   | 0.9506  |
| Breed     |     |     | X     | 0        | .              | .   | .       | .       |

**Solution for Random Effects**

| Effect    | place | Estimate  | Std Err Pred | DF  | t Value | Pr >  t |
|-----------|-------|-----------|--------------|-----|---------|---------|
| Intercept | Rural | -3.3363   | 3.7861       | 129 | -0.88   | 0.3798  |
| place     | Rural | -1.44E-06 | 0.003313     | 129 | 0       | 0.9997  |
| place     | Rural | 0         | 0.003313     | 129 | 0       | 1       |
| Intercept | Urban | 3.3363    | 3.7861       | 129 | 0.88    | 0.3798  |
| place     | Urban | 0         | 0.003313     | 129 | 0       | 1       |
| place     | Urban | 1.44E-06  | 0.003313     | 129 | 0       | 0.9997  |

**Type 3 Tests of Fixed Effects**

| Effect | Num DF | Den DF | F Value | Pr > F |
|--------|--------|--------|---------|--------|
| Sex    | 1      | 129    | 1.09    | 0.2985 |
| Age    | 1      | 129    | 0.47    | 0.4959 |
| Breed  | 1      | 129    | 0       | 0.9506 |

The SAS System

The Mixed Procedure

**Model Information**

|                           |                 |
|---------------------------|-----------------|
| Data Set                  | LIB.ANTIBIOTICS |
| Dependent Variable        | Betalactam      |
| Covariance Structure      | Unstructured    |
| Subject Effect            | place           |
| Estimation Method         | REML            |
| Residual Variance Method  | Profile         |
| Fixed Effects SE Method   | Model-Based     |
| Degrees of Freedom Method | Containment     |

**Class Level Information**

| Class | Levels | Values      |
|-------|--------|-------------|
| place | 2      | Rural Urban |
| Sex   | 2      | F M         |
| Age   | 2      | A Y         |
| Breed | 2      | L X         |

**Dimensions**

|                          |    |
|--------------------------|----|
| Covariance Parameters    | 7  |
| Columns in X             | 7  |
| Columns in Z per Subject | 3  |
| Subjects                 | 2  |
| Max Obs per Subject      | 81 |

**Number of Observations**

|                             |     |
|-----------------------------|-----|
| Number of Observations Read | 134 |
| Number of Observations Used | 134 |

Number of Observations Not Used

0

Iteration History

| Iteration | Evaluations | -2 Res Log Like | Criterion |
|-----------|-------------|-----------------|-----------|
| 0         | 1           | 1102.751728     |           |
| 1         | 1           | 998.387682      | 0         |

Convergence criteria met but final Hessian is not positive definite.

Covariance Parameter Estimates

| Cov Parm | Subject | Estimate |
|----------|---------|----------|
| UN(1,1)  | place   | 326.61   |
| UN(2,1)  | place   | 0        |
| UN(2,2)  | place   | 5.69E-06 |
| UN(3,1)  | place   | 0        |
| UN(3,2)  | place   | 0        |
| UN(3,3)  | place   | 5.69E-06 |
| Residual |         | 108.39   |

Fit Statistics

|                          |        |
|--------------------------|--------|
| -2 Res Log Likelihood    | 998.4  |
| AIC (Smaller is Better)  | 1012.4 |
| AICC (Smaller is Better) | 1013.3 |
| BIC (Smaller is Better)  | 1003.2 |

Null Model Likelihood Ratio Test

| DF | Chi-Square | Pr > ChiSq |
|----|------------|------------|
| 6  | 104.36     | <.0001     |

Solution for Fixed Effects

| Effect    | Sex | Age | Breed | Estimate | Standard Error | DF  | t Value | Pr >  t |
|-----------|-----|-----|-------|----------|----------------|-----|---------|---------|
| Intercept |     |     |       | 16.4637  | 12.9455        | 0   | 1.27    | .       |
| Sex       | F   |     |       | -4.7682  | 1.857          | 129 | -2.57   | 0.0114  |
| Sex       | M   |     |       | 0        | .              | .   | .       | .       |
| Age       |     | A   |       | 4.6739   | 1.9671         | 129 | 2.38    | 0.019   |
| Age       |     | Y   |       | 0        | .              | .   | .       | .       |
| Breed     |     |     | L     | -1.1083  | 1.9885         | 129 | -0.56   | 0.5782  |
| Breed     |     |     | X     | 0        | .              | .   | .       | .       |

Solution for Random Effects

| Effect    | place | Estimate  | Std Err Pred | DF  | t Value | Pr >  t |
|-----------|-------|-----------|--------------|-----|---------|---------|
| Intercept | Rural | -12.742   | 12.8159      | 129 | -0.99   | 0.322   |
| place     | Rural | -2.22E-07 | 0.002386     | 129 | 0       | 0.9999  |
| place     | Rural | 0         | 0.002386     | 129 | 0       | 1       |
| Intercept | Urban | 12.742    | 12.8159      | 129 | 0.99    | 0.322   |
| place     | Urban | 0         | 0.002386     | 129 | 0       | 1       |
| place     | Urban | 2.22E-07  | 0.002386     | 129 | 0       | 0.9999  |

Type 3 Tests of Fixed Effects

| Effect | Num DF | Den DF | F Value | Pr > F |
|--------|--------|--------|---------|--------|
| Sex    | 1      | 129    | 6.59    | 0.0114 |
| Age    | 1      | 129    | 5.65    | 0.019  |
| Breed  | 1      | 129    | 0.31    | 0.5782 |

The Mixed Procedure

| Model Information         |                 |
|---------------------------|-----------------|
| Data Set                  | LIB.ANTIBIOTICS |
| Dependent Variable        | Betalactam      |
| Covariance Structure      | Unstructured    |
| Subject Effect            | place           |
| Estimation Method         | REML            |
| Residual Variance Method  | Profile         |
| Fixed Effects SE Method   | Model-Based     |
| Degrees of Freedom Method | Containment     |

| Class Level Information |        |             |
|-------------------------|--------|-------------|
| Class                   | Levels | Values      |
| place                   | 2      | Rural Urban |
| Sex                     | 2      | F M         |
| Age                     | 2      | A Y         |
| Breed                   | 2      | L X         |

| Dimensions               |    |
|--------------------------|----|
| Covariance Parameters    | 7  |
| Columns in X             | 5  |
| Columns in Z per Subject | 3  |
| Subjects                 | 2  |
| Max Obs per Subject      | 81 |

|                                 |     |
|---------------------------------|-----|
| Number of Observations          |     |
| Number of Observations Read     | 134 |
| Number of Observations Used     | 134 |
| Number of Observations Not Used | 0   |

| Iteration History |             |                 |           |   |
|-------------------|-------------|-----------------|-----------|---|
| Iteration         | Evaluations | -2 Res Log Like | Criterion |   |
| 0                 | 1           | 1108.360575     |           |   |
| 1                 | 1           | 1001.909066     |           | 0 |

Convergence criteria met but final Hessian is not positive definite.

| Covariance Parameter Estimates |         |          |
|--------------------------------|---------|----------|
| Cov Parm                       | Subject | Estimate |
| UN(1,1)                        | place   | 321.36   |
| UN(2,1)                        | place   | 0        |
| UN(2,2)                        | place   | 5.66E-06 |
| UN(3,1)                        | place   | 0        |
| UN(3,2)                        | place   | 0        |
| UN(3,3)                        | place   | 5.66E-06 |
| Residual                       |         | 107.83   |

| Fit Statistics           |        |
|--------------------------|--------|
| -2 Res Log Likelihood    | 1001.9 |
| AIC (Smaller is Better)  | 1015.9 |
| AICC (Smaller is Better) | 1016.8 |
| BIC (Smaller is Better)  | 1006.8 |

| Null Model Likelihood Ratio Test |            |            |
|----------------------------------|------------|------------|
| DF                               | Chi-Square | Pr > ChiSq |
| 6                                | 106.45     | <.0001     |

**Solution for Fixed Effects**

| Effect    | Sex | Age | Estimate | Standard Error | DF  | t Value | Pr >  t |
|-----------|-----|-----|----------|----------------|-----|---------|---------|
| Intercept |     |     | 15.8817  | 12.8007        | 0   | 1.24    |         |
| Sex       | F   |     | -4.928   | 1.83           | 130 | -2.69   | 0.008   |
| Sex       | M   |     | 0        |                |     |         |         |
| Age       |     | A   | 4.5499   | 1.9494         | 130 | 2.33    | 0.0211  |
| Age       |     | Y   | 0        |                |     |         |         |

**Solution for Random Effects**

| Effect    | place | Estimate  | Std Err Pred | DF  | t Value | Pr >  t |
|-----------|-------|-----------|--------------|-----|---------|---------|
| Intercept | Rural | -12.6401  | 12.7117      | 130 | -0.99   | 0.3219  |
| place     | Rural | -2.23E-07 | 0.002379     | 130 | 0       | 0.9999  |
| place     | Rural | 0         | 0.002379     | 130 | 0       | 1       |
| Intercept | Urban | 12.6401   | 12.7117      | 130 | 0.99    | 0.3219  |
| place     | Urban | 0         | 0.002379     | 130 | 0       | 1       |
| place     | Urban | 2.23E-07  | 0.002379     | 130 | 0       | 0.9999  |

**Type 3 Tests of Fixed Effects**

| Effect | Num DF | Den DF | F Value | Pr > F |
|--------|--------|--------|---------|--------|
| Sex    | 1      | 130    | 7.25    | 0.008  |
| Age    | 1      | 130    | 5.45    | 0.0211 |
