# Supplementary material for: Inappropriate usage of selected antimicrobials: Comparative residue proportions in rural and urban beef in Uganda
Source: PubMed Central journal article supplement (PMC6328120; doi:10.1371/journal.pone.0209006), 2019-01-10
Supplement: pone.0209006.s003.pdf [file pone.0209006.s003.pdf]

| Solution for Fixed Effects |          |                |         |
|----------------------------|----------|----------------|---------|
| Effect                     | Estimate | Standard Error | P Value |
| Intercept                  | 16.5     | 12.9           |         |
| Sex                        | -4.8     | 1.9            | 0.011   |
| Females                    |          |                |         |
| Sex Males                  |          |                |         |
| Age Adults                 | 4.7      | 2.0            | 0.019   |
| Age Young                  |          |                |         |
| Breed Local                | -1.1     | 2.0            | 0.578   |
| Breed Cross                |          |                |         |

| Solution for Random Effects |       |          |                 |            |
|-----------------------------|-------|----------|-----------------|------------|
| Effect                      | place | Estimate | Std Err<br>Pred | P<br>Value |
| Intercept                   | Rural | -12.7    | 12.816          | 0.322      |
| place                       | Rural | 0.0      | 0.002           | 1.000      |
| place                       | Rural | 0.0      | 0.002           | 1.000      |
| Intercept                   | Urban | 12.7     | 12.816          | 0.322      |
| place                       | Urban | 0.0      | 0.002           | 1.000      |
| place                       | Urban | 0.0      | 0.002           | 1.000      |

| Type 3 Tests of Fixed Effects |         |         |
|-------------------------------|---------|---------|
| Effect                        | F Value | P Value |
| Sex                           | 6.59    | 0.011   |
| Age                           | 5.65    | 0.019   |
| Breed                         | 0.31    | 0.578   |

| Solution for Fixed Effects |          |                |         |
|----------------------------|----------|----------------|---------|
| Effect                     | Estimate | Standard Error | P Value |
| Intercept                  | 9.3      | 4.6            |         |
| Sex                        | -2.7     | 2.6            | 0.299   |
| Females                    |          |                |         |
| Sex Males                  | 0.0      |                |         |
| Age Adults                 | 1.9      | 2.7            | 0.496   |
| Age Young                  | 0.0      |                |         |
| Breed Local                | -0.2     | 2.8            | 0.951   |
| Breed Cross                | 0.0      |                |         |

| Solution for Random Effects |       |          |              |         |
|-----------------------------|-------|----------|--------------|---------|
| Effect                      | place | Estimate | Std Err Pred | P Value |
| Intercept                   | Rural | -3.3     | 3.786        | 0.380   |
| place                       | Rural | 0.0      | 0.003        | 1.000   |
| place                       | Rural | 0.0      | 0.003        | 1.000   |
| Intercept                   | Urban | 3.3      | 3.786        | 0.380   |
| place                       | Urban | 0.0      | 0.003        | 1.000   |
| place                       | Urban | 0.0      | 0.003        | 1.000   |

| Type 3 Tests of Fixed Effects |         |         |
|-------------------------------|---------|---------|
| Effect                        | F Value | P Value |
| Sex                           | 1.09    | 0.299   |
| Age                           | 0.47    | 0.496   |
| Breed                         | 0       | 0.951   |
